# Supplementary material
Source: MDPI journal article supplement (https://www.mdpi.com/2073-4344/6/12/191)
Supplement: s1 [file s1]

# Supplementary Materials: New Tailor-Made Alkyl-Aldehyde Bifunctional Supports for Lipase Immobilization

Robson Carlos Alnoch, Ricardo Rodrigues de Melo, Jose M. Palomo, Emanuel Maltempi de Souza, Nadia Krieger, and Cesar Mateo

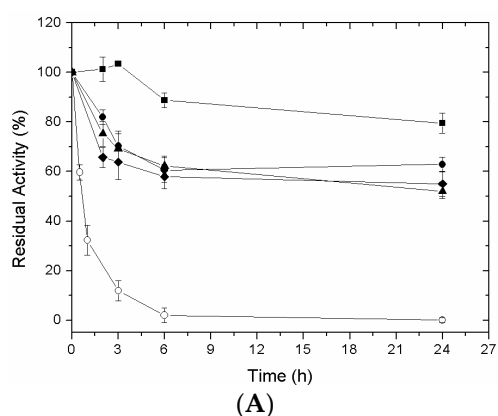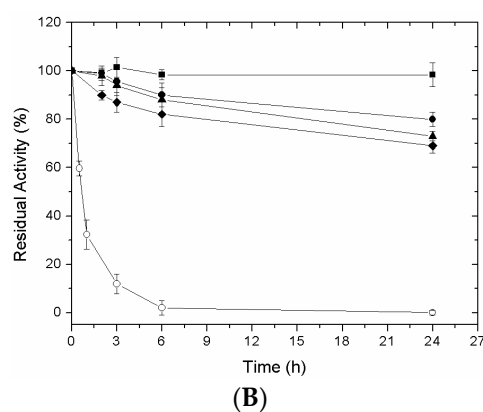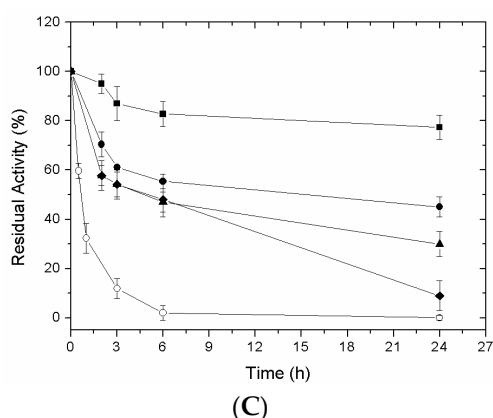

**Figure S1.** Thermal stability of different preparations of LipC12. Inactivation was performed at pH 7.0, 55 °C after incubation at different pHs for 1 h. (■) pH 10; (●) pH 8.5; (▲) pH 7.0; (◆) pH 7.0 without aldehyde groups and (○) Soluble enzyme. (A) C8-aldehyde/LipC12; (B) C12-aldehyde/LipC12; (C) C18-aldehyde/LipC12. Results are expressed as the average of triplicate assays  $\pm$  the standard error of the mean.

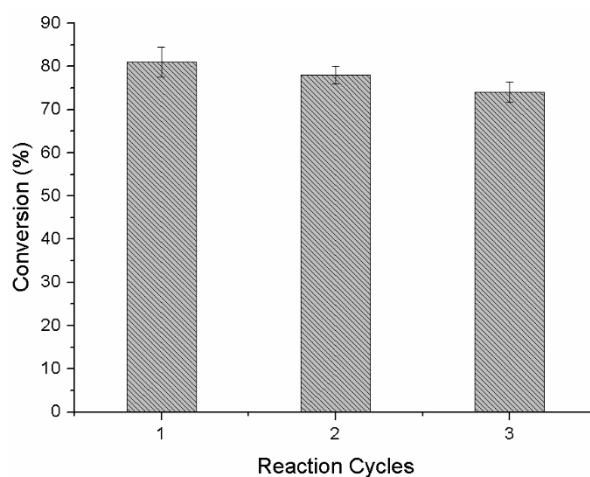

**Figure S2.** Hydrolysis of 3,4,6-tri-*O*-acetyl-D-glucal during successive reaction cycles. C12-aldehyde/LipC12-PEG preparation was repeatedly used to catalyze the hydrolysis of 3,4,6-tri-*O*-acetyl-D-glucal at pH 5.0, 25 and 4 °C. Results are expressed as the average of duplicate assays  $\pm$  the standard error of the mean.

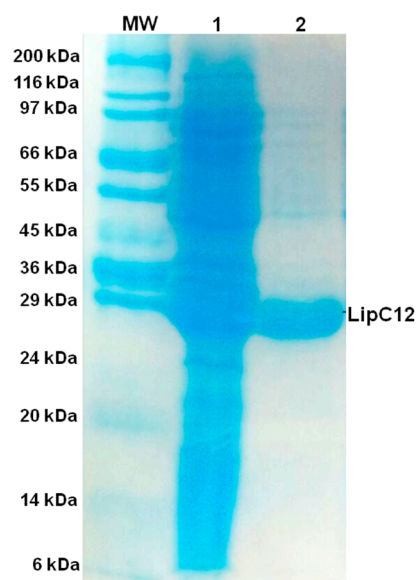

**Figure S3.** SDS-PAGE analysis of the lipase LipC12 purification. The lanes were loaded as follows: lane MW, protein molecular weight standards; lane 1, supernatant of the bacterial cell lysate; lane 2, eluted fractions of LipC12. Proteins were stained with Coomassie Brilliant Blue R-250.

**Table S1.** Summary of the purification of LipC12.

| Step             | Volume (mL) | Total Protein <sup>a</sup> (mg) | Total Activity <sup>b</sup> (U) | Specific Activity (U·mg <sup>-1</sup> ) | Purification Factor | Activity Yield (%) |
|------------------|-------------|---------------------------------|---------------------------------|-----------------------------------------|---------------------|--------------------|
| Crude extract    | 4           | 12.8                            | 52                              | 4.1                                     | 1                   | 100                |
| Purified extract | 8           | 4.9                             | 30                              | 6.2                                     | 1.5                 | 58                 |

<sup>a</sup> Protein was determined by the Bradford method [33]; <sup>b</sup> One unit of activity (U) was defined as the production of 1  $\mu$ mol of *p*-nitrophenol per minute, under the conditions of the assay.
